# Supplementary material
Source: publisher figshare collection journal article supplement (https://karger.figshare.com/ndownloader/files/38311275)
Supplement: Supplementary file 1 [file 38311275]

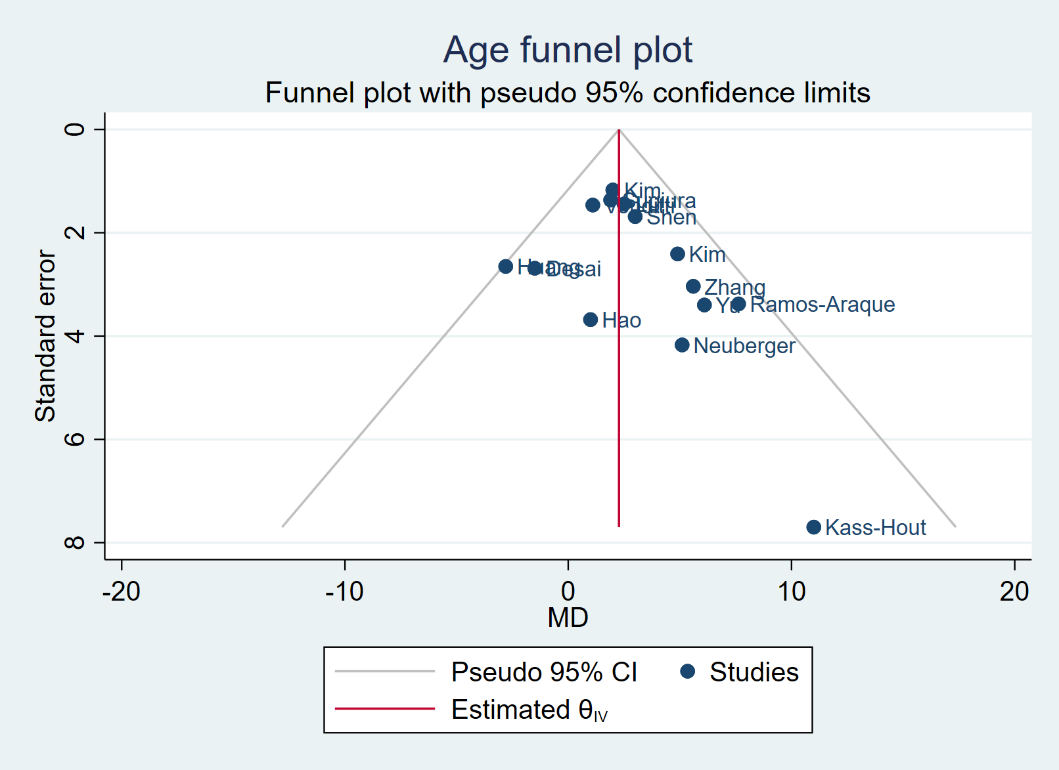
**A.**

**
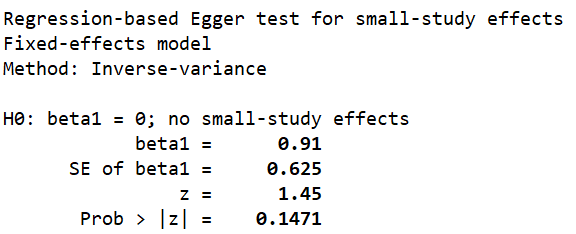
**


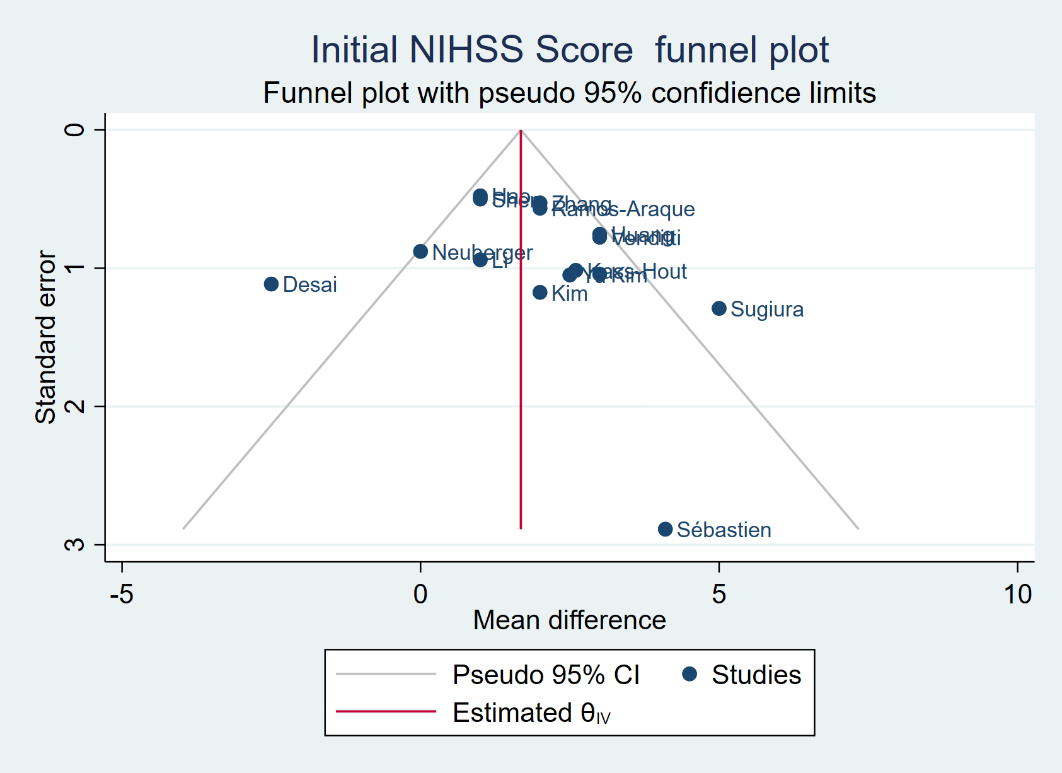
**B.**

**
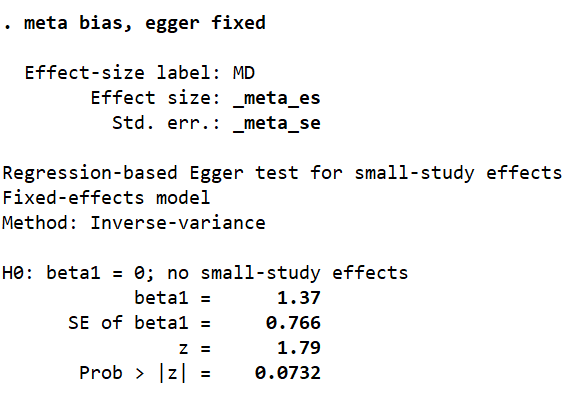
**


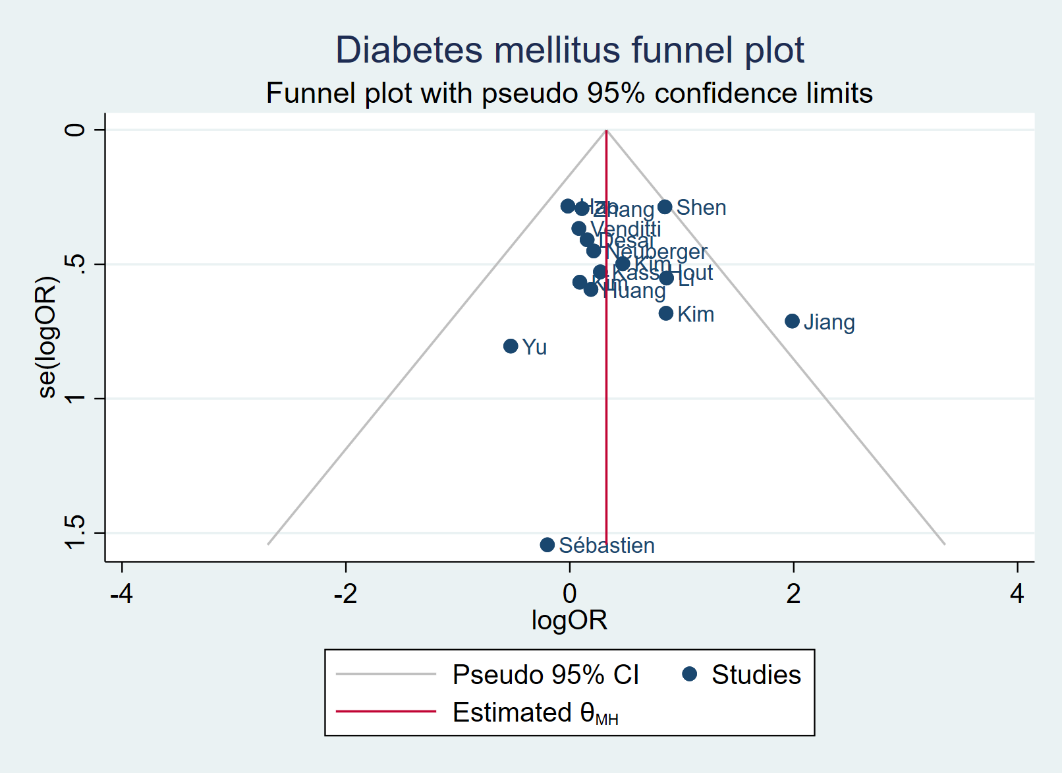
**C.**


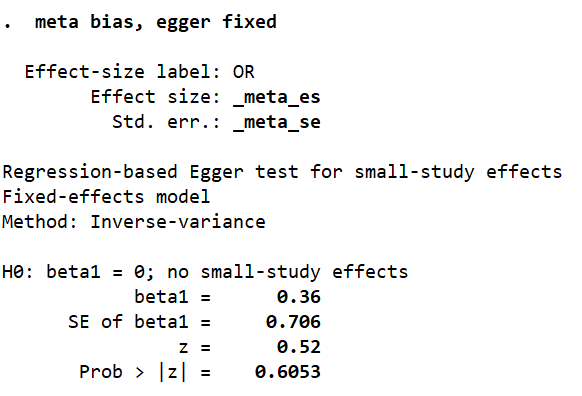


**eFigure 1C. Diabetes mellitus funnel plot and Egger’s test results**


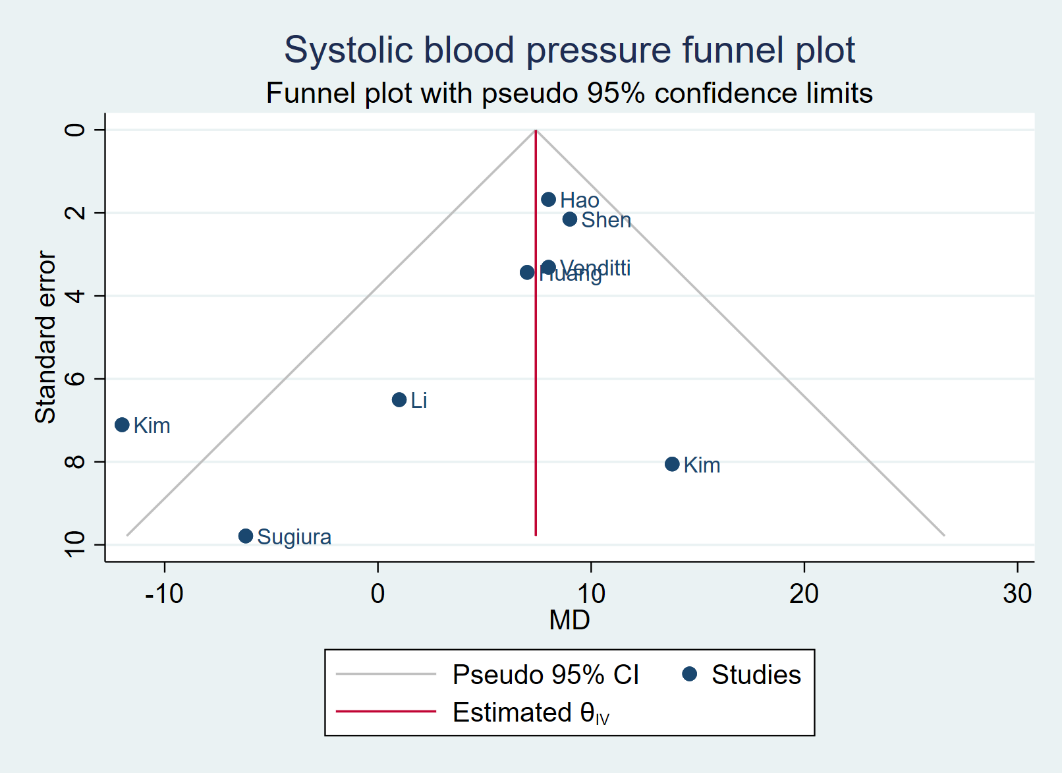
**D.**

**
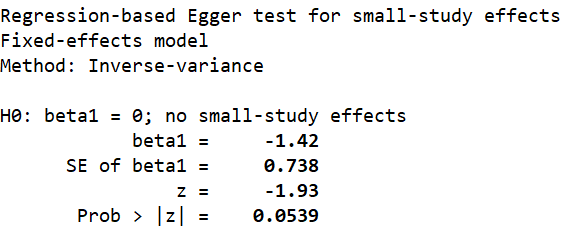
**


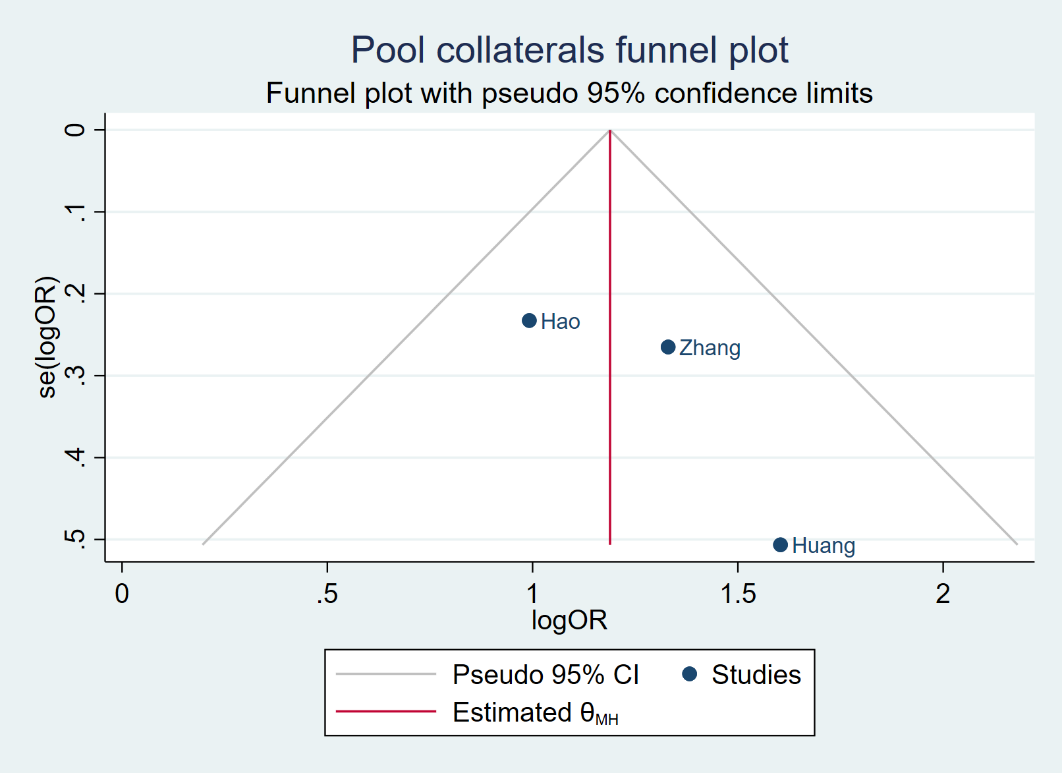
**E.**

**
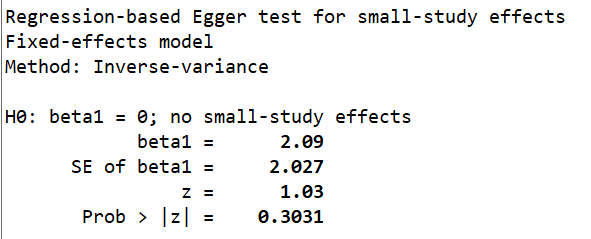
**


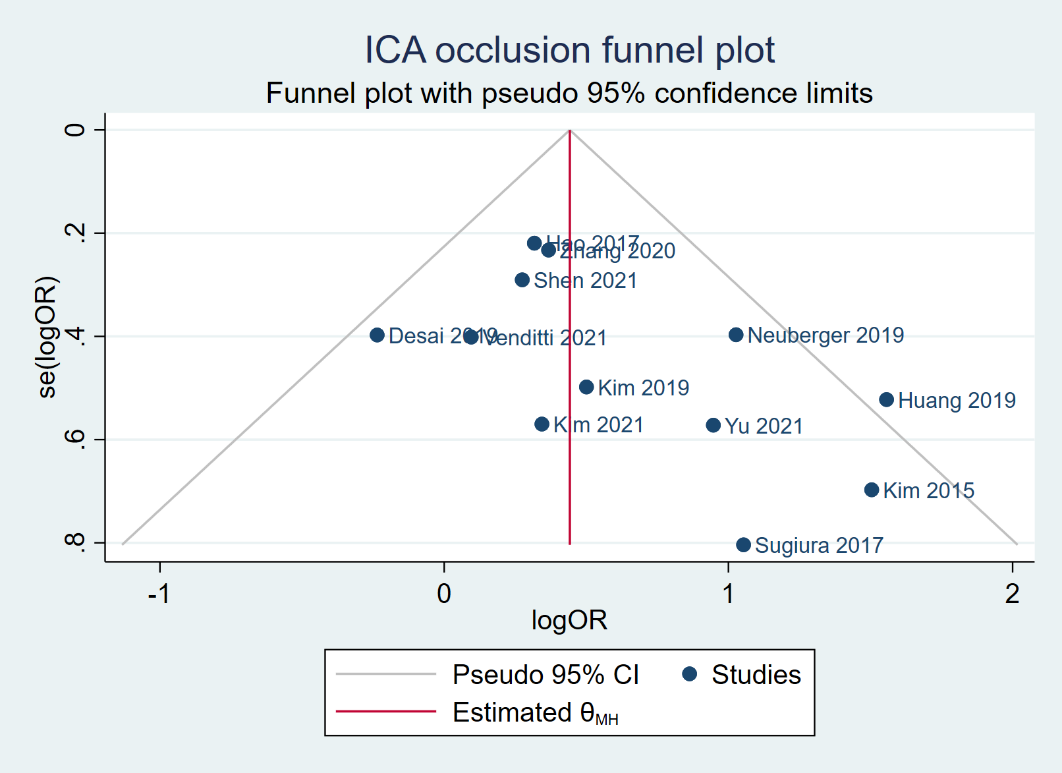
**F.**

**
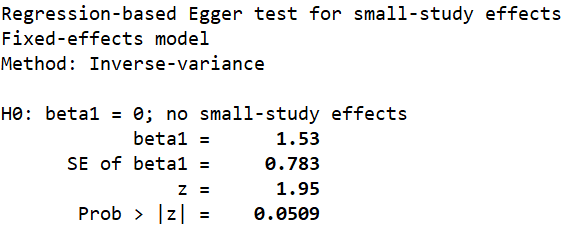
**


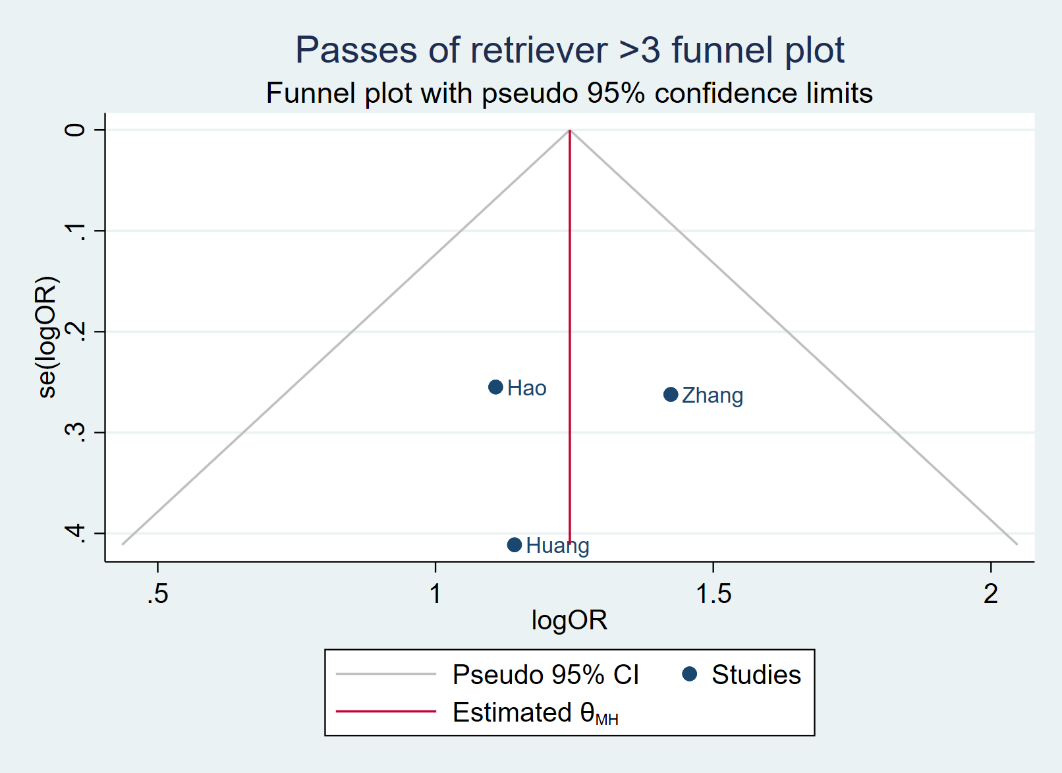
**G.**

**
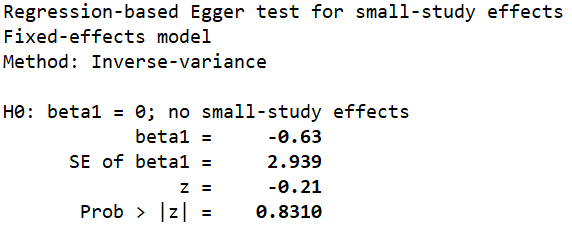
**


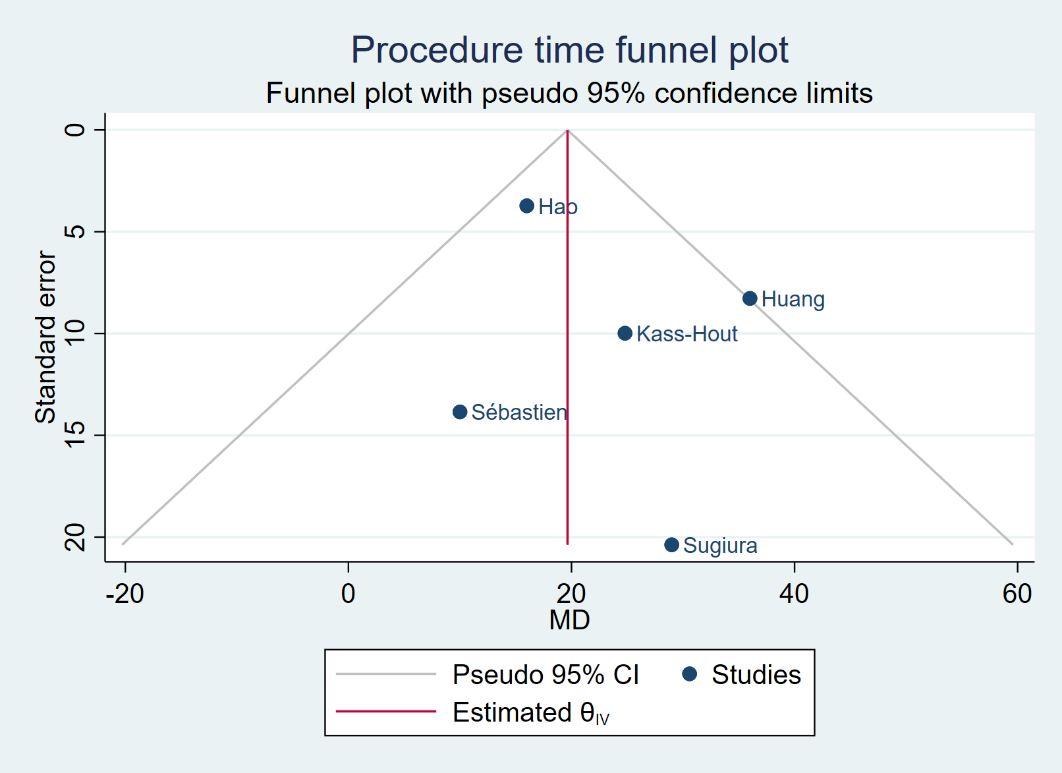
**H.**

**
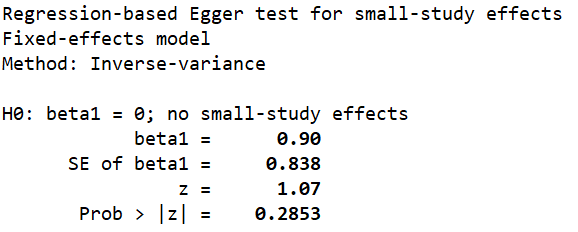
**


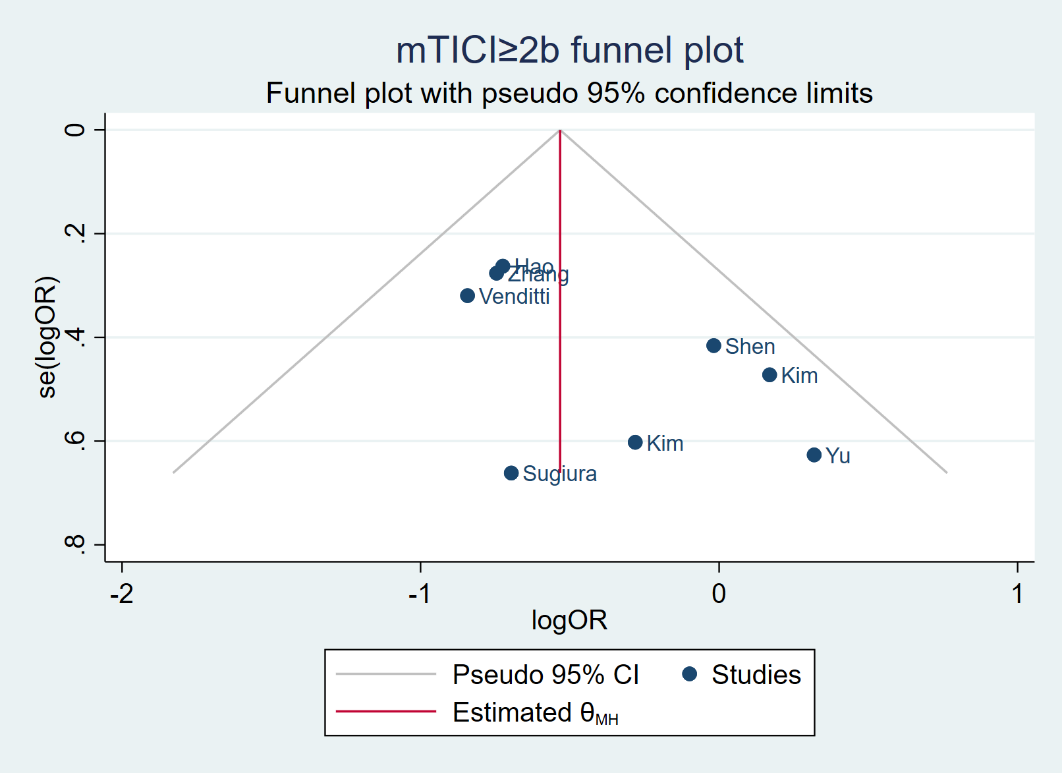
**I.**

**
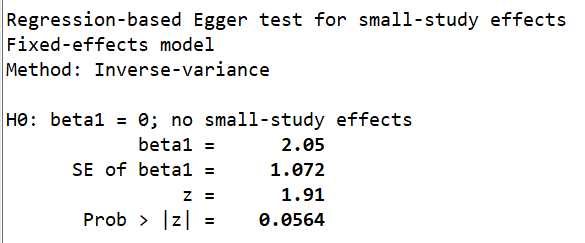
**

**eFigure 1.** **Funnel plot and Egger’s test of predictors for sICH in patients with AIS.** Age (A), Initial NIHSS Score (B), Diabetes mellitus (C), Systolic blood pressure (D), Pool collaterals (E), ICA occlusion (F), Passes of retriever >3 (G), Procedure time (H), mTICI≥2b (I). EVT: Endovascular Thrombectomy; sICH: Symptomatic Intracranial Hemorrhage; AIS: Acute Ischemic Stroke; NIHSS: National Institute of Health Stroke Scale; ICA: Internal Carotid Artery; mTICI: modified Thrombolysis In Cerebral Infarction.
